# Supplementary material
Source: publisher figshare collection journal article supplement (https://asha.figshare.com/articles/dataset/_/21476871)

Name:

Date:

Examiner:

1.    \_\_\_ well
2.    \_\_\_ banana
3.    \_\_\_ king
4.    \_\_\_ calendar
5.    \_\_\_ typewriter
6.    \_\_\_ saw
7.    \_\_\_ bone
8.    \_\_\_ football
9.    \_\_\_ owl
10.   \_\_\_ hose
11.   \_\_\_ man
12.   \_\_\_ foot
13.   \_\_\_ lion
14.   \_\_\_ nose
15.   \_\_\_ baby
16.   \_\_\_ hat
17.   \_\_\_ vest
18.   \_\_\_ helicopter
19.   \_\_\_ rope
20.   \_\_\_ queen

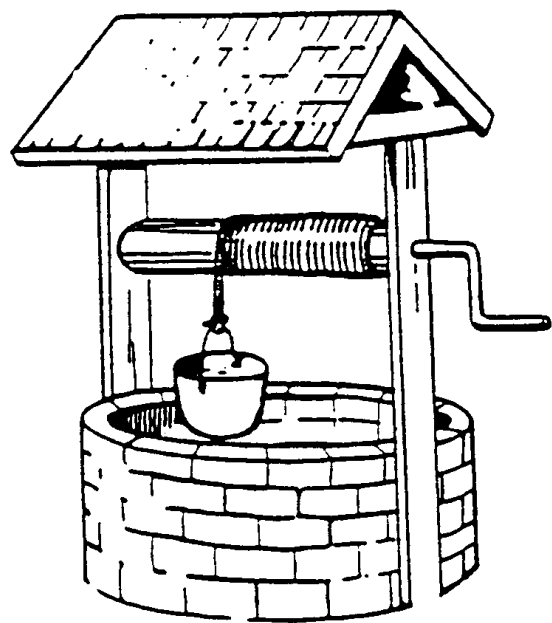

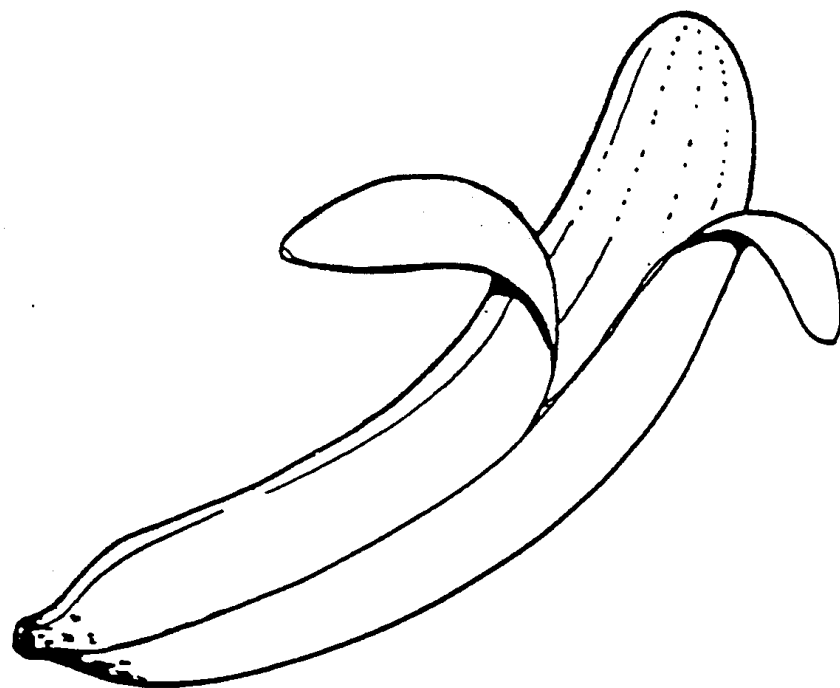

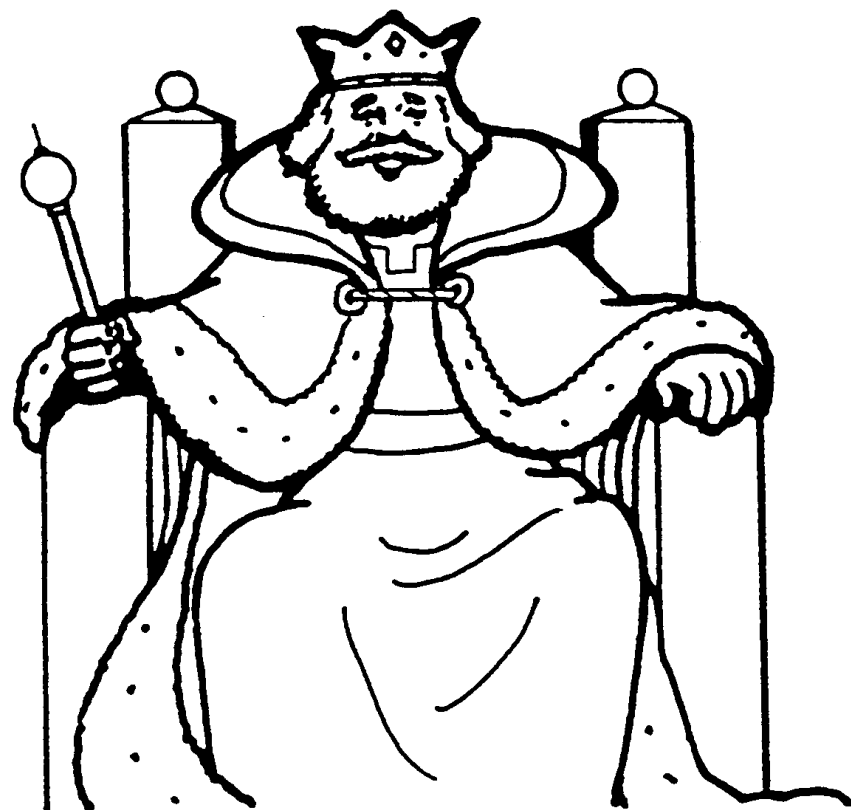

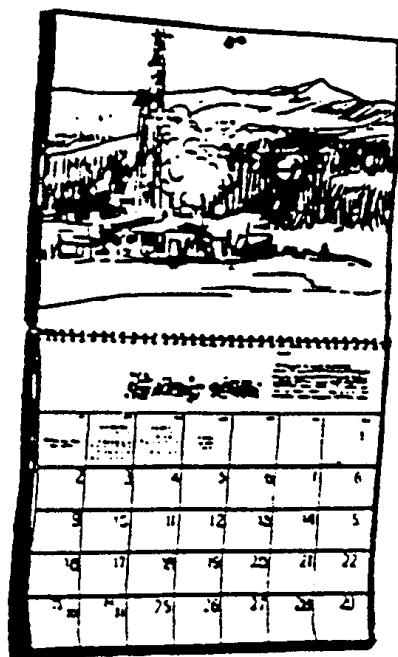

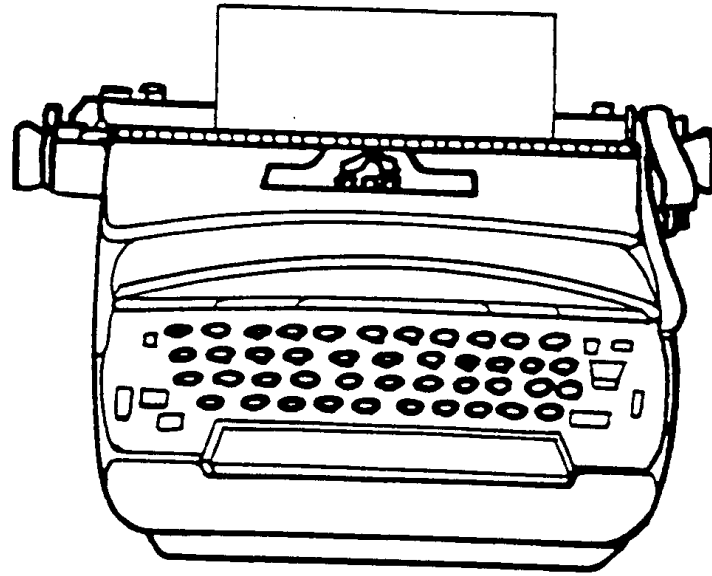

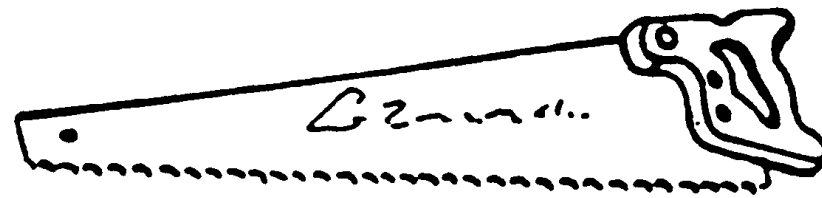

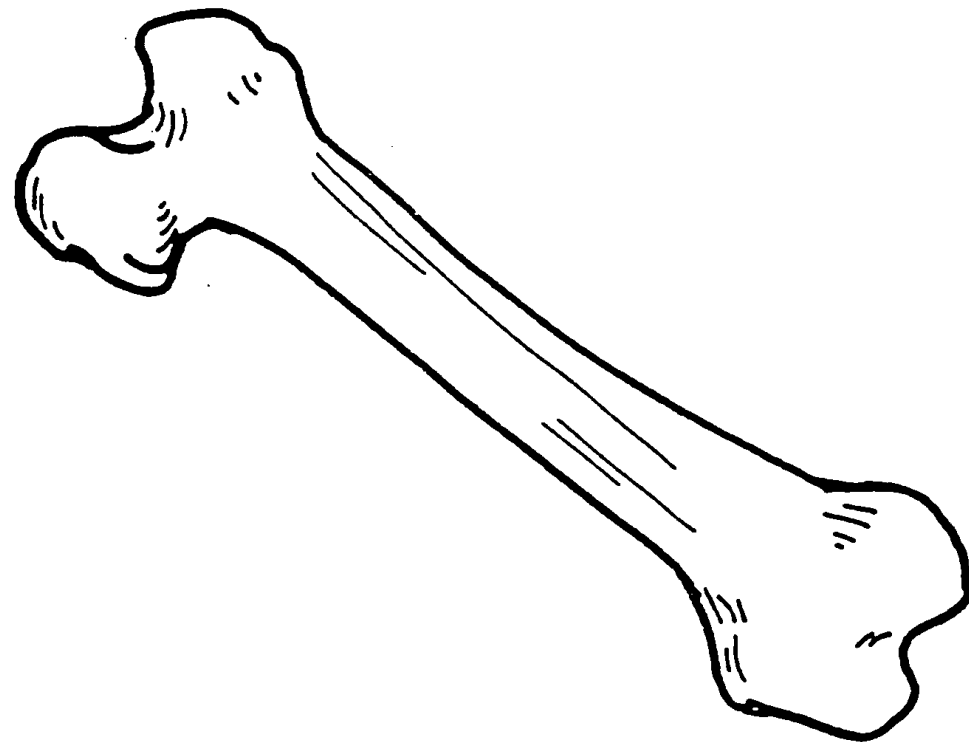



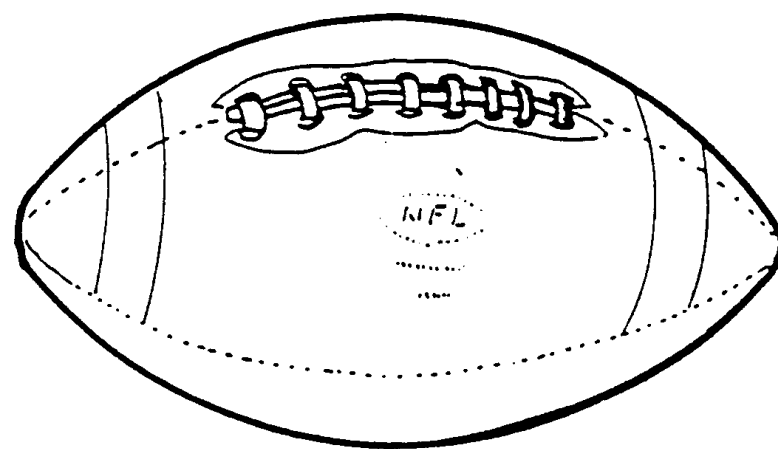

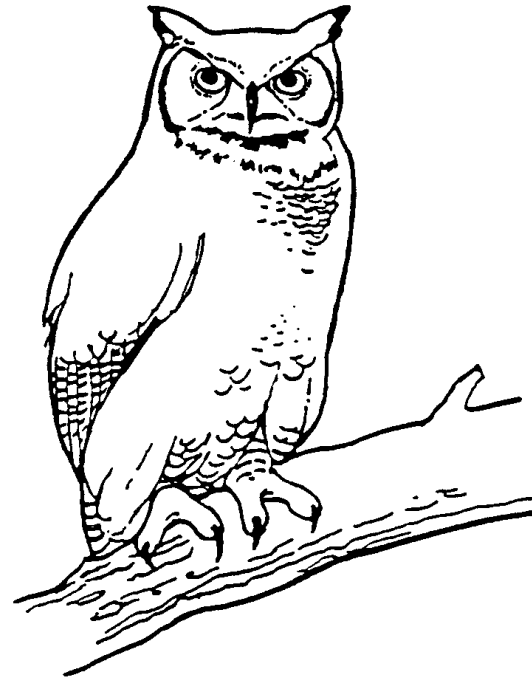

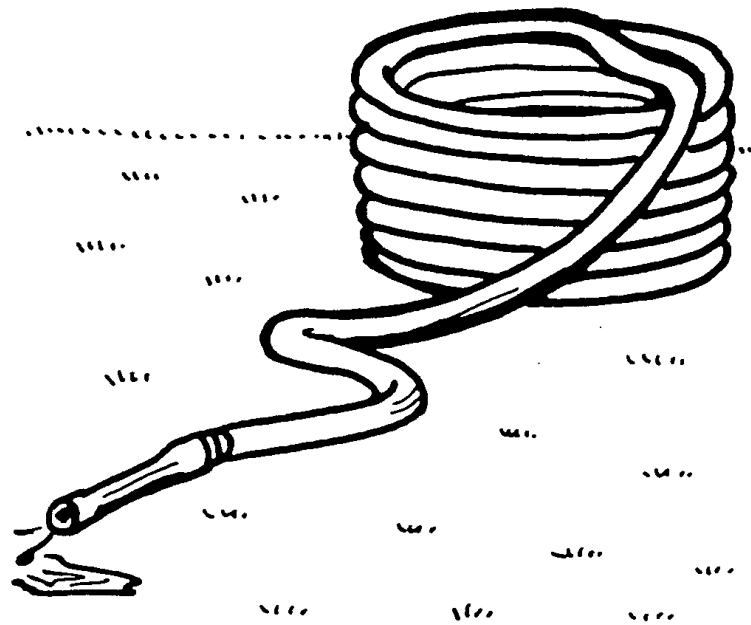

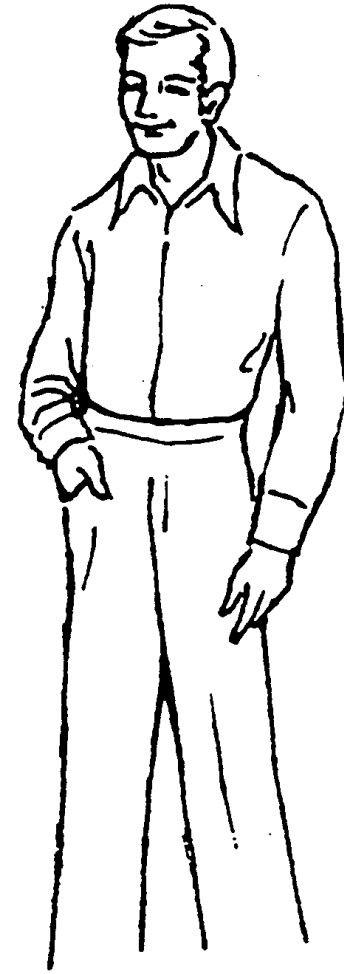

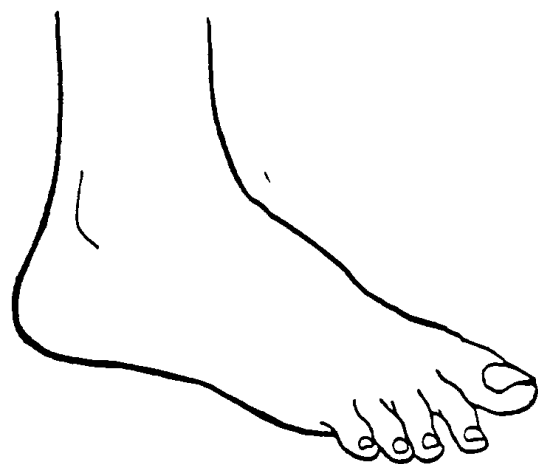

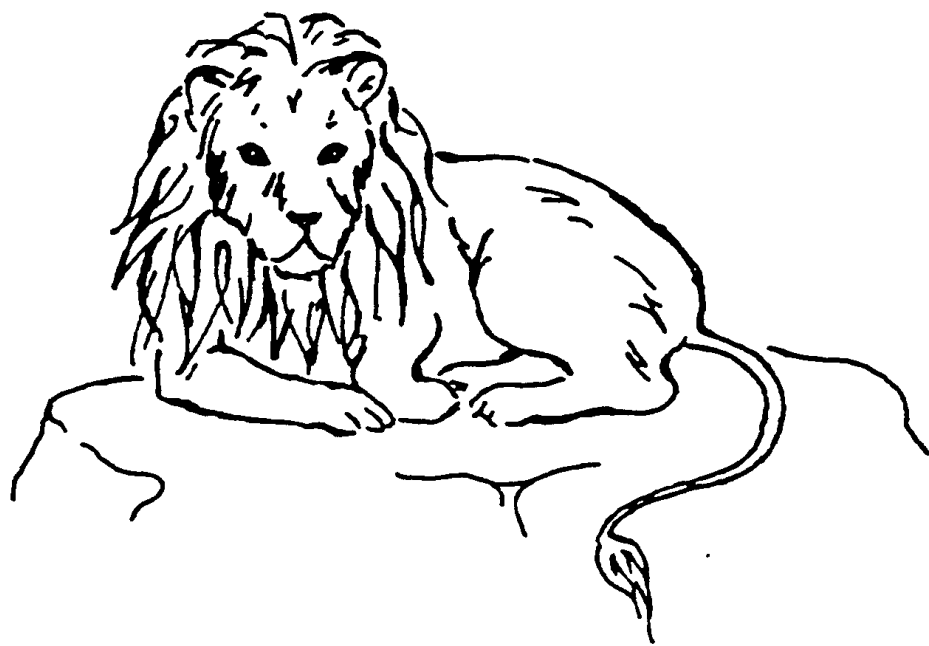

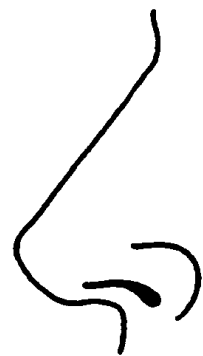

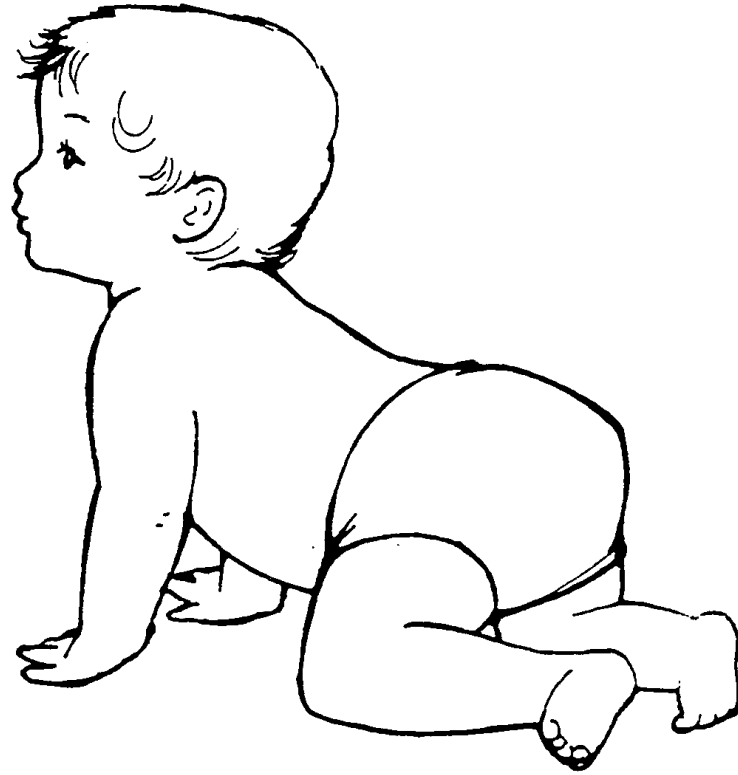



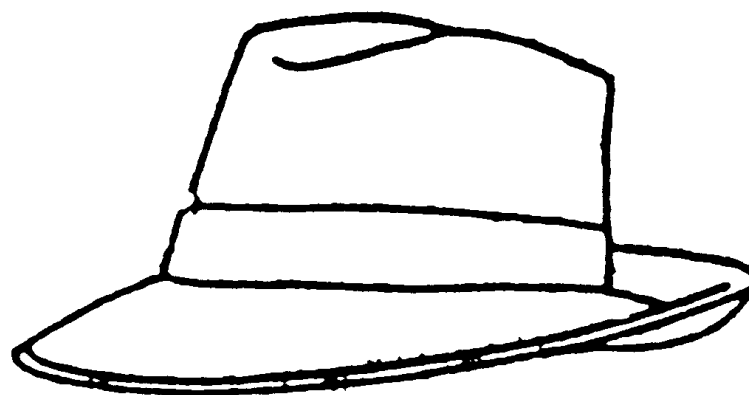

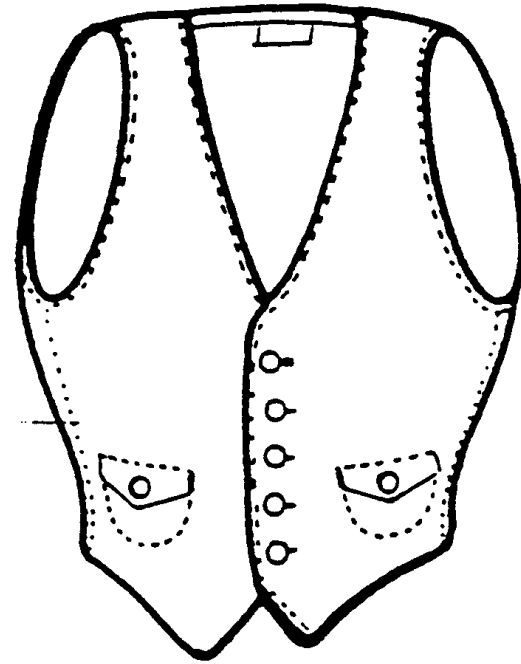

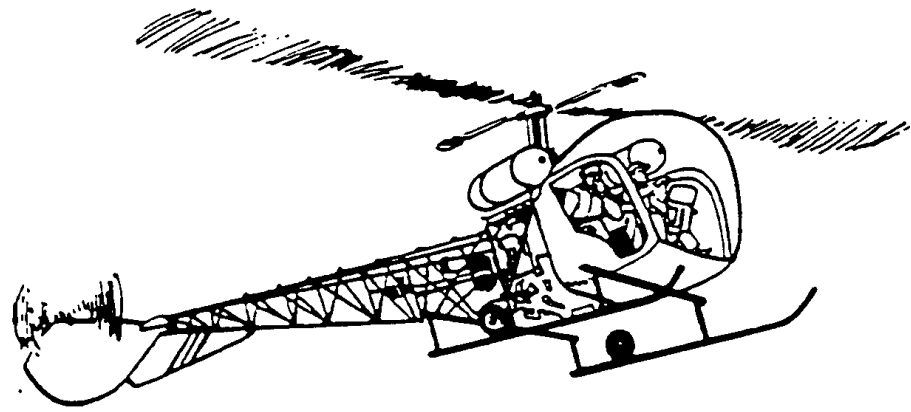

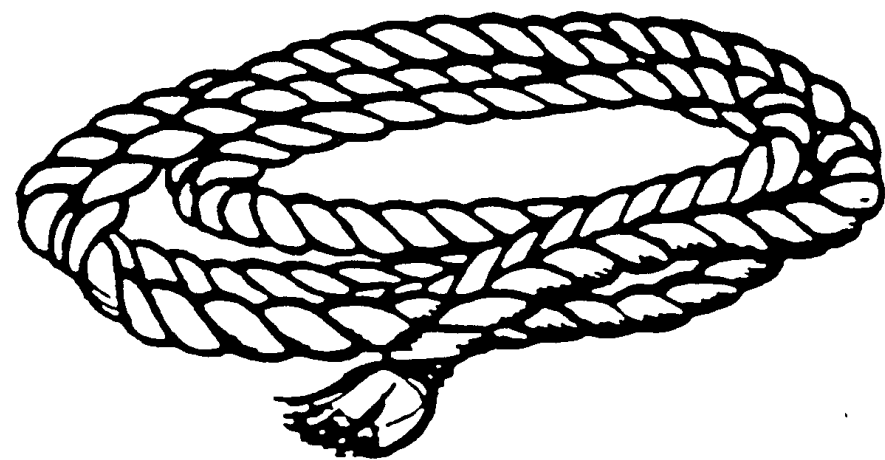

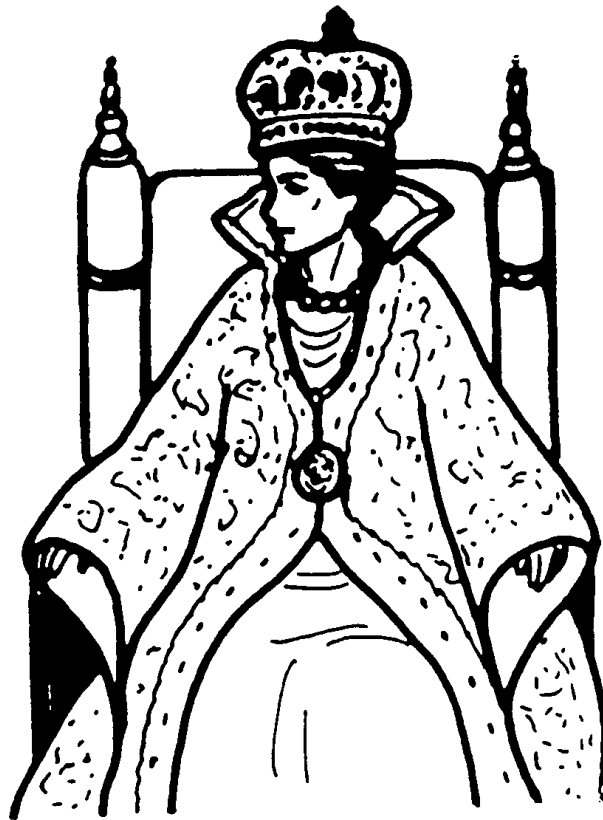

Supplement: Supplementary file 1 [file 2]
